# Supplementary material for: The Modular Arbitrary-Order Ocean-Atmosphere Model: MAOOAM v1.0
Source: Copernicus journal article supplement (doi:10.5194/gmd-9-2793-2016), 2016-08-24
Supplement: Supplementary file [file gmd-9-2793-2016-supplement-title-page.pdf › gmd-9-2793-2016-supplement-title-page.pdf]

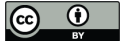

## *Supplement of*

# **The Modular Arbitrary-Order Ocean-Atmosphere Model: MAOOAM v1.0**

**Lesley De Cruz et al.**

*Correspondence to:* Lesley De Cruz (lesley.deacruz@meteo.be)

- gmd-9-2793-2016-supplement-title-page.pdf
- MAOOAM-v1.0
  - LICENSE.txt
  - README.md
  - fortran
    - \* IC.nml
    - \* LICENSE.txt
    - \* Makefile
    - \* README.md
    - \* aotensor\_def.f90
    - \* ic\_def.f90
    - \* inprod\_analytic.f90
    - \* int\_params.nml
    - \* integrator.f90
    - \* maoam.f90
    - \* modeselection.nml
    - \* params.f90
    - \* params.nml
    - \* stat.f90
    - \* tensor.f90
    - \* test\_aotensor.f90
    - \* test\_inprod\_analytic.f90
    - \* tests
    - \* util.f90
  - lua
    - \* IC.lua
    - \* LICENSE.txt
    - \* README.md

- \* aotensor.lua
- \* array.lua
- \* doc
- \* gz.lua
- \* inprod\_analytic.lua
- \* maoam.lua
- \* maoam\_tl\_ad.lua
- \* modeselection.lua
- \* params.lua
- \* restore.lua
- \* rk2.lua
- \* rk4.lua
- \* stat.lua
- \* tensor.lua
- \* test\_aotensor.lua
- \* test\_inprod\_analytic.lua
- \* test\_tl\_ad.lua
- \* write\_IC.lua
- lua\_mpi
  - \* IC.lua
  - \* LICENSE.txt
  - \* README.md
  - \* ao\_mpi.lua
  - \* aotensor.lua
  - \* array.lua
  - \* doc
  - \* gz.lua
  - \* inprod\_analytic.lua
  - \* maoam.lua
  - \* maoam\_tl\_ad.lua
  - \* modeselection.lua
  - \* params.lua
  - \* restore.lua
  - \* rk2.lua
  - \* rk4.lua
  - \* stat.lua
  - \* tensor.lua
  - \* test\_aotensor.lua
  - \* test\_inprod\_analytic.lua
  - \* test\_tl\_ad.lua
  - \* write\_IC.lua

The copyright of individual parts of the supplement might differ from the CC-BY 3.0 licence.
